# Supplementary material for: Large-scale drivers of Caucasus climate variability in meteorological records and Mt El'brus ice cores
Source: Copernicus journal article supplement (doi:10.5194/cp-13-473-2017), 2017-05-12
Supplement: Supplementary file 1 [file cp-13-473-2017-supplement.zip]

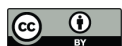

## *Supplement of*

# **Large-scale drivers of Caucasus climate variability in meteorological records and Mt El’brus ice cores**

**Anna Kozachek et al.**

*Correspondence to:* Anna Kozachek (kozachek@aari.ru)

- [cp-13-473-2017-supplement-title-page.pdf](#)
- [Elbrus data.xlsx](#)
- [Supplement.pdf](#)

The copyright of individual parts of the supplement might differ from the CC-BY 3.0 licence.
