# Supplementary material for: Large-scale drivers of Caucasus climate variability in meteorological records and Mt El'brus ice cores
Source: Copernicus journal article supplement (doi:10.5194/cp-13-473-2017), 2017-05-12
Supplement: Supplementary file 1 [file Elbrus data.xlsx]

## Sheet: d18O
	Cold season	Warm season
1914	-19.9332	-10.2165
1915	-14.2858	-11.2203
1916	-14.1373	-10.224
1917	-18.8042	-12.4402
1918	-21.8736	-13.3905
1919	-17.4442	-12.1193
1920	-19.5111	-10.8419
1921	-19.6105	-12.7163
1922	-22.3542	-12.0784
1923	-17.0576	-11.3258
1924	-19.794	-11.4445
1925	-15.2635	-9.13228
1926	-15.3801	-12.5191
1927	-23.5377	-14.8557
1928	-13.6747	-7.55249
1929	-14.4596	-11.1213
1930	-16.2062	-9.64304
1931	-22.8211	-14.0562
1932	-17.0505	-13.7956
1933	-18.0767	-10.8229
1934	-20.7	-11.6604
1935	-18.2064	-10.5154
1936	-21.2295	-13.7836
1937	-23.8703	-11.9213
1938	-20.1098	-10.5378
1939	-20.8776	-10.7189
1940	-18.4295	-11.3419
1941	-19.2459	-13.1042
1942	-21.2897	-13.2204
1943	-21.8499	-10.3095
1944	-18.6426	-10.229
1945	-20.1779	-13.8389
1946	-24.9847	-15.064
1947	-21.5633	-15.149
1948	-25.8378	-13.9126
1949	-22.17	-10.5982
1950	-21.1264	-13.7679
1951	-19.9424	-12.5664
1952	-22.5874	-11.2052
1953	-22.2078	-11.4326
1954	-22.8756	-10.3785
1955	-19.4301	-12.0762
1956	-26.8606	-14.5918
1957	-23.4678	-15.5402
1958	-20.3197	-12.3402
1959	-18.6271	-12.5683
1960	-19.8327	-10.849
1961	-16.4679	-12.1239
1962	-22.2196	-10.6715
1963	-23.4256	-15.5073
1964	-15.5073	-10.7577
1965	-19.9845	-12.3431
1966	-21.0308	-11.0282
1967	-17.9535	-10.3247
1968	-25.5644	-12.7905
1969	-20.0008	-12.6373
1970	-25.2221	-14.3994
1971	-23.3286	-11.9068
1972	-21.9233	-11.4497
1973	-16.0926	-9.49585
1974	-14.6165	-10.4039
1975	-16.2915	-7.06714
1976	-17.7227	-11.3943
1977	-19.9477	-10.8429
1978	-19.7744	-11.1545
1979	-22.0327	-12.0602
1980	-17.3077	-13.7079
1981	-21.3028	-11.5441
1982	-18.3583	-10.0733
1983	-21.1925	-11.5635
1984	-19.3826	-10.0647
1985	-17.7032	-10.147
1986	-18.6813	-11.7746
1987	-23.055	-11.1069
1988	-19.5701	-11.7331
1989	-16.183	-9.3127
1990	-18.8196	-13.6681
1991	-16.5935	-10.582
1992	-16.768	-12.1151
1993	-16.7166	-9.84281
1994	-16.4918	-9.63686
1995	-19.3587	-12.1007
1996	-22.3794	-11.8586
1997	-19.5491	-12.9836
1998	-19.7915
1999		-9.45806
2000	-17.2298	-8.45268
2001	-19.1256	-12.83
2002	-21.2053	-11.4168
2003	-18.9699	-12.3453
2004	-19.2345	-13.1598
2005	-21.0026	-13.9376
2006	-17.5769	-9.6926
2007	-18.6554	-8.85541
2008	-18.3958	-8.9648
2009	-22.6716	-11.5242
2010	-19.7303	-9.64933
2011	-17.121	-8.10011
2012	-15.2744	-9.85184
2013	-18.9955

## Sheet: Accumulation
	Cold season	Warm season
1914	0.420872	0.774784
1915	0.334723	0.880914
1916	0.352614	0.428343
1917	0.998602	1.17407
1918	0.524601	0.604847
1919	0.28088	0.884921
1920	0.608954	0.787824
1921	1.47843	0.952634
1922	0.323083	0.621699
1923	0.949969	0.703927
1924	1.01802	0.570691
1925	0.312542	0.53634
1926	0.929678	0.605102
1927	0.306344	0.227996
1928	0.53199	0.745162
1929	0.985628	0.585182
1930	0.256182	0.199066
1931	0.274433	0.714702
1932	0.357731	0.805737
1933	0.376374	0.675157
1934	0.590187	0.207085
1935	0.544702	0.65278
1936	0.322224	0.936277
1937	0.390909	0.611731
1938	1.16902	0.386735
1939	0.647093	0.589438
1940	1.53834	0.402436
1941	1.4253	0.910284
1942	0.411387	0.779373
1943	0.540093	0.468496
1944	0.959438	0.601322
1945	0.463095	0.650291
1946	0.521048	0.782632
1947	0.573375	1.02702
1948	0.435275	0.574874
1949	0.378345	0.57572
1950	0.446826	0.832992
1951	0.311526	0.499701
1952	0.697313	0.677821
1953	0.69471	0.72773
1954	0.787156	0.44936
1955	0.427813	0.789448
1956	0.657916	0.965566
1957	0.663954	0.588367
1958	0.949028	0.3117
1959	0.640229	0.40791
1960	1.0432	0.250651
1961	0.747802	0.664247
1962	0.631201	0.719735
1963	1.00653	0.669505
1964	0.390963	0.278157
1965	1.21501	0.397462
1966	1.05928	0.325126
1967	0.649428	0.385498
1968	0.867687	0.65237
1969	0.720488	0.433206
1970	0.504808	1.41675
1971	0.626028	0.558787
1972	0.365068	0.534093
1973	0.652206	0.371982
1974	0.604927	0.304241
1975	0.526418	0.298442
1976	0.643282	0.354959
1977	0.530275	0.632002
1978	0.810091	0.440586
1979	0.717694	0.598552
1980	0.491438	1.12409
1981	0.437929	0.379579
1982	0.820189	0.551398
1983	0.544061	0.365823
1984	0.677133	0.618605
1985	0.851477	0.680338
1986	0.514779	0.893956
1987	0.876512	0.704583
1988	0.839962	0.396097
1989	0.591219	0.735561
1990	0.60802	0.688098
1991	0.327384	0.598045
1992	0.585723	0.679674
1993	1.03738	0.400421
1994	0.572009	0.351912
1995	0.76587	0.921342
1996	0.447022	1.53791
1997	0.826525	1.15853
1998	0.68764	0.56
1999	0.56	0.5851
2000	0.777532	0.334592
2001	0.339962	1.58
2002	1.21453	0.874272
2003	1.07745	0.902514
2004	0.88738	1.08876
2005	1.12099	1.10185
2006	1.09227	0.648709
2007	0.693156	0.499985
2008	1.3742	0.377774
2009	0.403778	0.666142
2010	2.43404	0.751301
2011	2.19082	0.293723
2012	0.571505	0.892036
2013	0.804753
